# Supplementary material for: TGF-β ligand cross-subfamily interactions in the response of Caenorhabditis elegans to a bacterial pathogen
Source: PubMed Central journal article supplement (PMC11210861; doi:10.1371/journal.pgen.1011324), 2024-06-14

**A**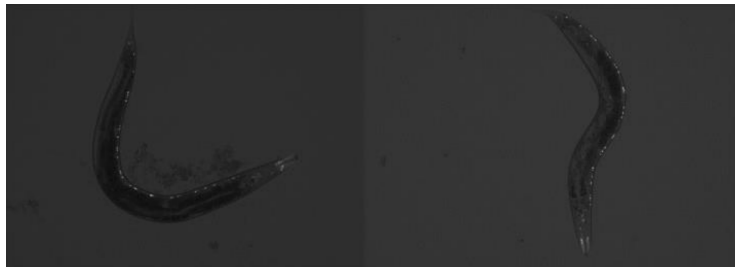

Control

Infected

**B**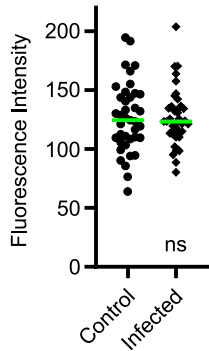

Supplement: pgen.1011324.s002.pdf [file pgen.1011324.s002.pdf]
