# Supplementary material for: TGF-β ligand cross-subfamily interactions in the response of Caenorhabditis elegans to a bacterial pathogen
Source: PubMed Central journal article supplement (PMC11210861; doi:10.1371/journal.pgen.1011324), 2024-06-14

**A**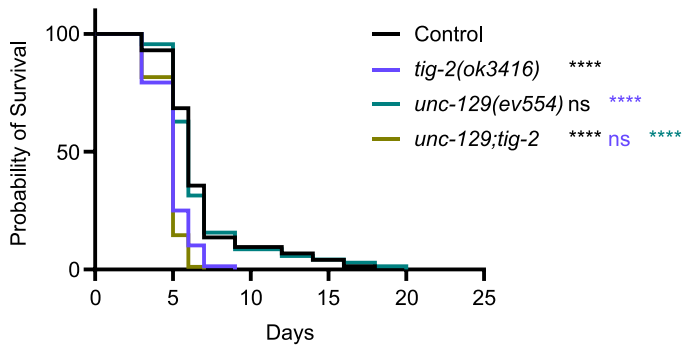**B**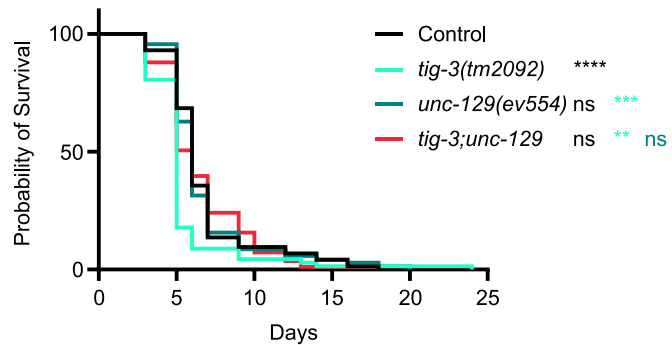**C**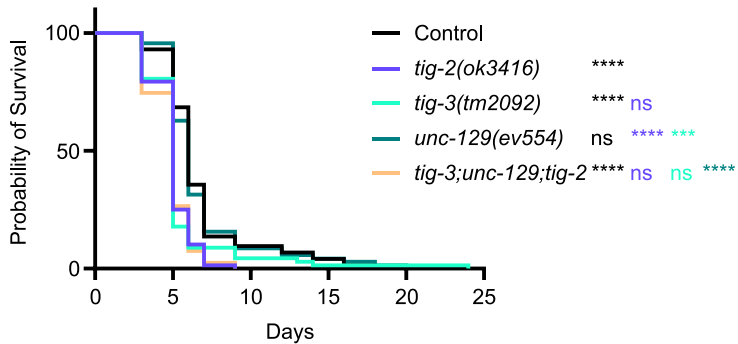

Supplement: pgen.1011324.s003.pdf [file pgen.1011324.s003.pdf]
