# Supplementary material for: TGF-β ligand cross-subfamily interactions in the response of Caenorhabditis elegans to a bacterial pathogen
Source: PubMed Central journal article supplement (PMC11210861; doi:10.1371/journal.pgen.1011324), 2024-06-14
Supplement: pgen.1011324.s004.pdf [file pgen.1011324.s004.pdf]

■ Signal sequence   
 ■ TIG-2 prodomain   
 ■ TIG-3 prodomain   
 ■ Cys intrachain disulfide  
■ TIG-2 mature domain   
 ■ TIG-3 mature domain   
 ■ Lys (replaces dimerization Cys)

**A**

>TIG-2

1 MLFEFSILLGFLVPRGDSKGIIYFVEERNKTYTQPLTGQATDKIGEQIRE

51 LFNIDINPNGPAVKANNVSTYMKRLYKQLENYEHGENHNEEVNAWLSA

101 DRIVSHMAQEVSHRLDDGSYSIRFAKEHVPAKEGQSIVRAQLRIHQIV

151 SPVFFYIEDTNLPGDITLVSSDDPTVVTDVTMVDWRWSHLQLSTLPIVTA

201 RASTNDELKIEAFLVIALKDEADAGPPKKRSRRSASTTPISAPPMRQKVKR

251 SESAYFEKPNENERQQRKGLYVDFDILGWKQWVIAPEGFSAFYQSGDQSA

301 PFSKEMNATSHAIVQSTLHRVRPNSTTPAKQAPSSLGSYKILFVDQNKQV

351 QIKRYRDMVVDEQGH

>TIG-3, isoform B

1 MHFFTRFHYCFVITIISINASSLSIERQKRQLLSALNLSRRPPLIHQAPV

51 IPDSMSTRKHDLYGGVLDKITLEPNRKSWTQLTPESLVKDQFOYSINSI

101 NHEILSASLIIDPKDTNISIVVYEVDELFGELQYVDRFEIRETLDKYHFD

151 ISHLFHKWMKQKSSDKMKIEITNSNTQNVINALSVLRNAPNFDVMVFQP

201 NTVTAGTSDQVGVIPFYVNFTEIGWNDWILSPPGFYANVSDTVQSTE

251 SDEVYQFMKAAISDLPEPQAPNYYGSVDMIVALSPRDIRKTRVHGLRAL

301 SSSIT

**B**

| Protein        | Subfamily <sup>a</sup> | Species           | Uniprot Entry | Signal Sequence <sup>b</sup> | (Prodomain $\supset$ Cleavage Site) | Mature Domain             |
|----------------|------------------------|-------------------|---------------|------------------------------|-------------------------------------|---------------------------|
| TIG-2          | BMP                    | <i>C. elegans</i> | O16273        | MLFEFSILLGFLVPRGDS           | ...PMRQ                             | KVKR <sup>c</sup> SESA... |
| TIG-3          | Activin                | <i>C. elegans</i> | A0A8S4QGI4    | MHFFTRFHYCFVITIISINASS       | ...INAL                             | SVLR <sup>a</sup> NAPN... |
| BMP-2          | BMP                    | <i>H. sapiens</i> | P12643        | MVAGTRCLLALLLPQVLLGGAAG      | ...PLHK                             | REKR <sup>d</sup> QAKH... |
| BMP-6          | BMP                    | <i>H. sapiens</i> | P22004        | MPGLGRRAQWLCWWGLLCS          | ...RQQS                             | R <sup>d</sup> NRST...    |
| BMP-15         | BMP                    | <i>H. sapiens</i> | O95972        | MVLLSILRILFLCELVLFMEHRAQM    | ...ESLL                             | RRTR <sup>d</sup> QADG... |
| GDF-9          | BMP                    | <i>H. sapiens</i> | O60383        | MARPKNFLLWFCCFAWLCFPISLG     | ...SSHH                             | RHRR <sup>d</sup> GQET... |
| Inh- $\beta$ A | Activin                | <i>H. sapiens</i> | P08476        | MPLLWLRGFLASCWIIIVRS         | ...HPRH                             | RRRR <sup>d</sup> GLEC... |
| Inh- $\beta$ B | Activin                | <i>H. sapiens</i> | P09529        | MDGLPGRALGAACLLLLAAGWLGPEAW  | ...HRIR                             | KR <sup>d</sup> GLEC...   |
| Inh- $\alpha$  | TGF- $\beta$           | <i>H. sapiens</i> | P05111        | MVLHLLLFLLLTPQGGHS           | ...SGGE                             | RARR <sup>d</sup> STPL... |
