# Supplementary material for: TGF-β ligand cross-subfamily interactions in the response of Caenorhabditis elegans to a bacterial pathogen
Source: PubMed Central journal article supplement (PMC11210861; doi:10.1371/journal.pgen.1011324), 2024-06-14

■ pLDDT/100   
 ■ pTM   
 ■ ipTM  
■ BMP subfamily   
 ■ TGF- $\beta$ /Activin subfamily

**A**

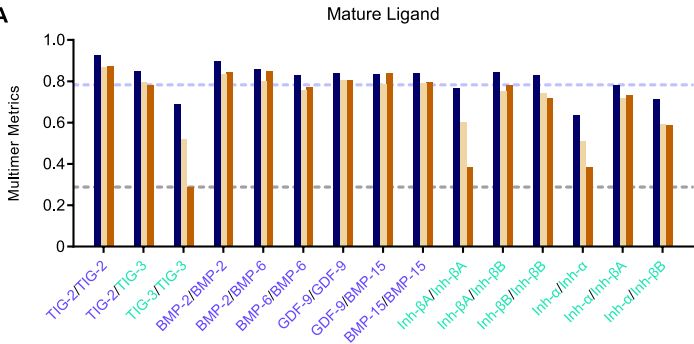

**B**

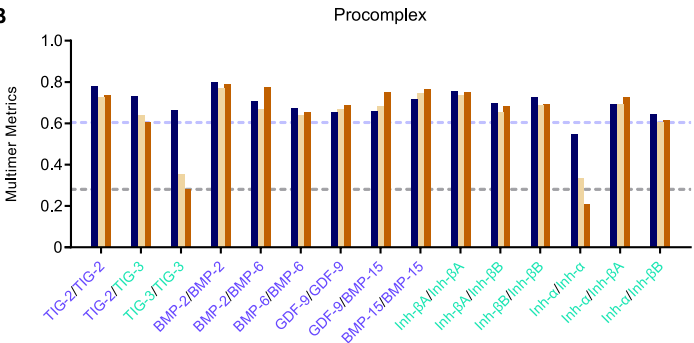

Supplement: pgen.1011324.s005.pdf [file pgen.1011324.s005.pdf]
