# Supplementary material for: TGF-β ligand cross-subfamily interactions in the response of Caenorhabditis elegans to a bacterial pathogen
Source: PubMed Central journal article supplement (PMC11210861; doi:10.1371/journal.pgen.1011324), 2024-06-14
Supplement: pgen.1011324.s006.pdf [file pgen.1011324.s006.pdf]

|             |                                                              |    |
|-------------|--------------------------------------------------------------|----|
| TIG-3.B     | -----NAPNFDVMVFQP-NTVTAGTSDCVGCCVIPFYVNFTEIGWNDWILSPPGF      | 49 |
| INHA_HUMAN  | -----STPLMSWPWSPSALRLLQRPPEEPAAHANCHRVALNISFQELGWERWIVYPPSF  | 54 |
| GDF9_HUMAN  | -GQETVSSSELKK-PLGPASFNLSEYFRQFLPQNECELHDFRLSFSQLKWDNWIVAPHRY | 58 |
| BMP15_HUMAN | -QADGISAEVT-----ASSSKHSGPENNQCSLHPFQISFRQLGWDHWI IAPPFY      | 48 |
| INHBA_HUMAN | -----GLECDGKVNICCKKQFFVFSFKDIGWNDWI IAPSGY                   | 35 |
| TIG-2       | -----SESAYFEKPNENERCQRKGLYVDFDILGWKQWVIAPEGF                 | 39 |
| BMP2_HUMAN  | -----QAKHKQRKRLKSSCKRHPLYVDFSDVGWNDWIVAPPGY                  | 38 |
| DBL-1       | SAQTGNSEKKNR-----KKGRKHHNTEAESNLCRRTDFYVDFDDLNWQDWIMAPKGY    | 52 |
|             | * : : * : * . * : : * :                                      |    |

|             |                                                                |     |
|-------------|----------------------------------------------------------------|-----|
| TIG-3.B     | YANVCSDTV-----ST-----ESDEVYQFMKAAISDLPEPKCA--PNYYGSVDMIV       | 94  |
| INHA_HUMAN  | IFHYCHGGCGLHIPNLSLP----VPGAPPTPAQPYSLPGAQPCCAALPGTMRPLHVRT     | 110 |
| GDF9_HUMAN  | NPRYCKGDCPRAVGHRYGSP----VHTMVQNI IYEKLDSSVPRPSCV--PAKYSPLSVLT  | 112 |
| BMP15_HUMAN | TPNYCKGTCLRVLRLDGLNSP----NHAI IQNLINQLVDQSVPRPSCV--PYKYVPISVLM | 102 |
| INHBA_HUMAN | HANYCEGECPSHIAGTSGSSLSFHSTVINHYRMRGHSPFANLKS CCV--PTKLRPMSMLY  | 93  |
| TIG-2       | SAFYCSGDCSAPFSKEMNAT----SHAI VQSTLHRVRPNSTTPAKCA--PSSLGSYKILF  | 93  |
| BMP2_HUMAN  | HAFYCHGECPFPLADHLNST----NHAI VQTLVNSVN-SKIPKACC V--PTELSAISMLY | 91  |
| DBL-1       | DAYQCQGSCPNMPAQLNAT----NHAI IQSLLHSLRPDEVPPPCCV--PTETSPLSILY   | 106 |
|             | * . * * ;                                                      |     |

|             |                           |     |
|-------------|---------------------------|-----|
| TIG-3.B     | ALS-PRDIRKTRVHGLRALSCSCT  | 117 |
| INHA_HUMAN  | TSDGGYSFKYETVPNLLTQHCACI  | 134 |
| GDF9_HUMAN  | IEP-DGSIAYKEYEDMIATKCTCR  | 135 |
| BMP15_HUMAN | IEA-NGSILYKEYEGMIAESCTCR  | 125 |
| INHBA_HUMAN | YDD-GQNI IKKDIQNMIVEECGCS | 116 |
| TIG-2       | VDQ-NKQVQIKRYRDMVVDECGCH  | 116 |
| BMP2_HUMAN  | LDE-NEKVVLKQYQDMVVEGCGCR  | 114 |
| DBL-1       | MDV-DKVIVIREYADMRVESCGR   | 129 |
|             | . : . * *                 |     |
